# Supplementary material for: Single vacancy-defect endohedral metallofullerene-superhalogens: molecular topology and nonlinear optical responses of Na@C59[9-4]([8-5])-AlX4 (X = Cl, Br) systems
Source: Royal Society of Chemistry journal article supplement (doi:10.1039/d3nj04330d), 2023-01-01
Supplement: d3nj04330d1.pdf [file d3nj04330d1.pdf]

## Supporting Information

### Single Vacancy Defected Endohedral Metallofullerene-Superhalogen Anions: Molecular Topology and Nonlinear Optical Responses of Na@C59[9-4]([8-5])-AlX<sub>4</sub> (X=Cl,Br) Systems

Nabil Omri<sup>\*ab</sup>, Néji Besbes<sup>c</sup>, Yuxiang Bu<sup>b</sup>

<sup>a</sup> DST Unit of Nanoscience (DST UNS) & Thematic Unit of Excellence (TUE), Department of Chemistry, Indian Institute of Technology Madras, Chennai 600036, India

[nabil.omri@iitm.ac.in](mailto:nabil.omri@iitm.ac.in) (N.O)

<sup>b</sup> School of Chemistry and Chemical Engineering, Shandong University, Jinan, 250100,

People's Republic of China [byx@sdu.edu.cn](mailto:byx@sdu.edu.cn) (Y.B)

<sup>c</sup> Group of Green and Applied Organic Chemistry, National , Laboratory of Composite Materials and Clay Minerals, Center for Research in Materials Sciences, Technopole of Borj Cedria, 8027, Tunisia [besbesneji@yahoo.fr](mailto:besbesneji@yahoo.fr) (B.N)

**\*Corresponding author. Tel.:** +86-531-88365740

**E-mail address:** [nabil.omri@iitm.ac.in](mailto:nabil.omri@iitm.ac.in) / [nabil.omri.ipest@gmail.com](mailto:nabil.omri.ipest@gmail.com)

**Table S1.** Optimized Cartesian coordinates (in Å) for Na@C59[9-4]-AlCl<sub>4</sub> and Na@C59[9-4]-AlBr<sub>4</sub> at the M06/LANL2DZ Level of Theory.....S3

**Table S2.** Optimized Cartesian coordinates (in Å) for Na@C59[8-5]-AlCl<sub>4</sub> and Na@C59[8-5]-AlBr<sub>4</sub> at the M06/LANL2DZ Level of Theory.....S4

**Table S3.** Optimized Cartesian coordinates (in Å) for Na@C60[6]-AlCl<sub>4</sub> and Na@C59[6]-AlBr<sub>4</sub> at the M06/LANL2DZ Level of Theory.....S6

**Table S4.** Optimized Cartesian coordinates (in Å) for Na@C60[5]-AlCl<sub>4</sub> and Na@C59[5]-AlBr<sub>4</sub> at the M06/LANL2DZ Level of Theory.....S7

**Figure S1.** Optimized geometrical structures of Na@C60[6]-AlX<sub>4</sub> and Na@C60[5]-AlX<sub>4</sub> (X=Cl,Br) endohedral metallofullerene-superhalogen compounds.....S9

**Figure S2.** Simulated absorption spectra (green curves) and charge-transfer spectra (CTSs, colored curves) of **A**) Na@C59[9-4]-AlCl<sub>4</sub> and **B**) Na@C59[8-5]-AlCl<sub>4</sub>.....S10

**Figure S3.** Contributions of molecular orbital (MO) transitions in **A)** Na@C59[9-4]-AlCl<sub>4</sub>, and **B)** Na@C59[9-4]-AlBr<sub>4</sub>, **C)** Na@C59[8-5]-AlBr<sub>4</sub> and **D)** Na@C59[8-5]-AlCl<sub>4</sub>, The numbers outside and inside the parentheses denote the energy gaps of the orbital (eV) and the contribution of the electronic transition of the corresponding excitations (%), respectively. **S11**

**Figure S4.** Transition density matrix (TDM) of (A) Na@C59[9-4]-AlBr<sub>4</sub>, (B) Na@C59[8-5]-AlBr<sub>4</sub>, (C) Na@C59[9-4]-AlCl<sub>4</sub> and (D) Na@C59[8-5]-AlCl<sub>4</sub> compounds. (See Figure 1 for the isomer atomic number).....**S12**

**Figure S5.** Total density of states (TDOS) map of **A)** Na@C59[9-4]-AlCl<sub>4</sub> and **B)** Na@C59[8-5]-AlCl<sub>4</sub> computed at the CAM-B3LYP/6-311G(d,p)/LANL2DZ level of theory.....**S13**

**Figure S6.** Simulated absorption spectra (green curves) and charge-transfer spectra (colored curves) of **A)** Na@C60[6]-AlCl<sub>4</sub>, **B)** Na@C60[5]-AlCl<sub>4</sub>, **C)** Na@C60[6]-AlBr<sub>4</sub>, and **D)** Na@C60[5]-AlBr<sub>4</sub>.....**S14**

**Table S5.** *D*, *S<sub>r</sub>*, *H*, *t* Indices and Hole-Electron Coulomb Attraction Energies ( $E_{\text{coul}}$ ) of the Selected Excited States of both the Na@C60[6]-AlX<sub>4</sub> and Na@C60[5]-AlX<sub>4</sub> (X=Cl,Br) Isomers, Calculated at the CAM-B3LYP/6-311g(d,p)/LANL2DZ Level of Theory.....**S15**

**Figure. S7** Real space representations of hole and electron distribution of Na@C60[6]-AlX<sub>4</sub> and Na@C60[5]-AlX<sub>4</sub> (X=Cl,Br). Green and blue regions denote the hole and electron distributions, respectively. The isovalues of hole and electron distributions are set to be 0.002 au.....**S16**

**Figure. S8** Scattering graphs between the reduced density gradient and sign ( $\lambda^2$ ) of **A)** Na@C59[8-5]-AlBr<sub>4</sub>, **B)** Na@C59[9-4]-AlBr<sub>4</sub>, **C)** Na@C59[9-4]-AlCl<sub>4</sub> and **D)** Na@C59[8-5]-AlCl<sub>4</sub> systems.....**S17**

**Table S6.** Polarizabilities (a.u) and (hyper)polarizabilities (a.u) in zero frequency limit and frequency-dependent fields.....**S18**

**Figure. S9** Polarizabilities ( $\alpha$ ) responses of C60, Na@C60[6]-AlX<sub>4</sub>, Na@C60[5]-AlX<sub>4</sub>, Na@C59[9-4]-AlX<sub>4</sub> and Na@C59[8-5]-AlX<sub>4</sub> (X=Cl, Br) in zero frequency limit and frequency-dependent fields.....**S19**

**Figure. S10** Variations of **A)** Polarizability  $\alpha$  ( $\lambda=1064.8$  nm) and **B)** Hyperpolarizability  $\beta$  ( $\lambda=1064.8$  and 589.08 nm) with the number of states.....**S20**

**Table S1.** Optimized Cartesian Coordinates (in Å) for Na@C59[9-4]-AlCl<sub>4</sub> and Na@C59[9-4]-AlBr<sub>4</sub> at the M06/LANL2DZ Level of Theory

| Na@C59[9-4]-AlCl <sub>4</sub>    |             |             |             | Na@C59[9-4]-AlBr <sub>4</sub>    |             |             |             |
|----------------------------------|-------------|-------------|-------------|----------------------------------|-------------|-------------|-------------|
| (Charge=0 ; Spin multiplicity=1) |             |             |             | (Charge=0 ; Spin multiplicity=1) |             |             |             |
| <i>Atom</i>                      | <i>x</i>    | <i>y</i>    | <i>z</i>    | <i>Atom</i>                      | <i>x</i>    | <i>y</i>    | <i>z</i>    |
| C                                | 0.20877500  | 2.54394500  | 2.20381300  | C                                | -0.96521100 | 2.56511400  | -2.14934400 |
| C                                | 0.66069500  | 3.40335200  | 1.11785000  | C                                | -1.43764300 | 3.41491800  | -1.06390900 |
| C                                | -0.09053500 | 3.45960500  | -0.05520100 | C                                | -0.71316900 | 3.45199800  | 0.12580200  |
| C                                | -1.34276200 | 2.69866400  | -0.21997800 | C                                | 0.53150100  | 2.68368700  | 0.30980100  |
| C                                | -1.62758300 | 1.72502500  | 0.73364200  | C                                | 0.84413700  | 1.72479700  | -0.65378600 |
| C                                | -0.90291900 | 1.72004400  | 1.99584400  | C                                | 0.14010800  | 1.73549900  | -1.93016100 |
| C                                | 1.37883100  | 2.00593300  | 2.87965500  | C                                | -2.12267800 | 2.04072200  | -2.85651700 |
| C                                | 2.55928300  | 2.47721100  | 2.16057100  | C                                | -3.31658200 | 2.50941700  | -2.15805400 |
| C                                | 2.11204900  | 3.33179400  | 1.06493800  | C                                | -2.88999100 | 3.34991500  | -1.04370900 |
| C                                | 2.75874200  | 3.26974600  | -0.17754700 | C                                | -3.56376300 | 3.27689700  | 0.18381600  |
| C                                | 0.58072200  | 3.40924000  | -1.34974600 | C                                | -1.41136000 | 3.39661100  | 1.40556600  |
| C                                | -1.63501700 | 2.53410600  | -1.63029100 | C                                | 0.79477400  | 2.49848200  | 1.72143500  |
| C                                | -2.06302700 | -0.35150200 | -0.79324200 | C                                | 1.24411200  | -0.37342000 | 0.86066500  |
| C                                | -2.00996600 | 0.33094100  | 0.42949100  | C                                | 1.21147000  | 0.32357600  | -0.35742000 |
| C                                | -1.67966800 | -0.47096200 | 1.63815400  | C                                | 0.89773600  | -0.46273200 | -1.58085900 |
| C                                | -0.94181300 | 0.38463800  | 2.54989500  | C                                | 0.18387200  | 0.40686600  | -2.49824000 |
| C                                | 0.14862300  | -0.10984000 | 3.27797400  | C                                | -0.89361000 | -0.07494700 | -3.25478900 |
| C                                | 1.34976400  | 0.70812500  | 3.40382800  | C                                | -2.08812100 | 0.74937600  | -3.39618500 |
| C                                | 3.64790500  | 1.61758400  | 1.98224000  | C                                | -4.41270200 | 1.65312600  | -2.01319700 |
| C                                | 3.62252800  | 0.27347600  | 2.54255700  | C                                | -4.38078800 | 0.31537200  | -2.58844000 |
| C                                | 2.49935500  | -0.16934000 | 3.24902800  | C                                | -3.24494300 | -0.12432300 | -3.27622400 |
| C                                | 2.00784700  | -1.53016500 | 3.06402800  | C                                | -2.76344500 | -1.48929800 | -3.09690300 |
| C                                | 0.55618200  | -1.49386800 | 3.10549100  | C                                | -1.31087800 | -1.45881500 | -3.10754000 |
| C                                | -0.19367100 | -2.33665300 | 2.27904900  | C                                | -0.58261500 | -2.31449600 | -2.27500900 |
| C                                | -1.37267800 | -1.83555600 | 1.59401500  | C                                | 0.58290800  | -1.82634100 | -1.55930700 |
| C                                | -1.48508400 | -2.53372800 | 0.33269800  | C                                | 0.66647100  | -2.53963300 | -0.30389000 |
| C                                | -1.95015900 | -1.81599700 | -0.75213200 | C                                | 1.11425500  | -1.83725300 | 0.79809800  |
| C                                | -0.30767200 | 2.61317900  | -2.21702500 | C                                | -0.54384900 | 2.58840400  | 2.28289100  |
| C                                | 0.95988800  | -2.06159000 | -2.90390100 | C                                | -1.84295900 | -2.09219500 | 2.88383000  |
| C                                | 0.87634000  | -0.71833800 | -3.29160500 | C                                | -1.76152900 | -0.75357700 | 3.28794900  |
| C                                | 2.08239800  | 0.09015100  | -3.27698500 | C                                | -2.96420800 | 0.05953600  | 3.25811500  |
| C                                | 3.28389600  | -0.41589200 | -2.76593500 | C                                | -4.15710700 | -0.43572500 | 2.71695200  |
| C                                | 3.32020700  | -1.76425100 | -2.22457300 | C                                | -4.18762500 | -1.77768900 | 2.15965500  |
| C                                | 1.79429200  | -3.39972800 | -1.15513000 | C                                | -2.64683100 | -3.40818100 | 1.10413200  |
| C                                | 0.33863700  | -3.44732700 | -1.09338600 | C                                | -1.19043500 | -3.46154200 | 1.07223800  |
| C                                | -0.16278200 | -2.66473600 | -2.21948500 | C                                | -0.70910800 | -2.69275100 | 2.21654600  |
| C                                | -1.28521200 | -1.87773800 | -2.02740200 | C                                | 0.42058800  | -1.90878400 | 2.05722900  |
| C                                | -1.31491700 | -0.42211300 | -2.20640100 | C                                | 0.45504100  | -0.45558800 | 2.25451200  |
| C                                | -0.26979500 | 0.16527800  | -2.93132300 | C                                | -0.60382700 | 0.12942900  | 2.96272800  |
| C                                | 1.71020600  | 1.46502800  | -3.03279600 | C                                | -2.58225100 | 1.43537500  | 3.03846400  |
| C                                | 2.55962800  | 2.31717300  | -2.31908200 | C                                | -3.41398700 | 2.29940800  | 2.31807400  |

|    |             |             |             |    |             |             |             |
|----|-------------|-------------|-------------|----|-------------|-------------|-------------|
| C  | 3.76201100  | 1.77352500  | -1.70794600 | C  | -4.60509200 | 1.76753300  | 1.67527600  |
| C  | 4.11718200  | 0.43751800  | -1.92686600 | C  | -4.96962200 | 0.43051900  | 1.87097600  |
| C  | 4.61747900  | -0.37713900 | -0.83085200 | C  | -5.44992800 | -0.36947300 | 0.75519600  |
| C  | 4.12530900  | -1.73736100 | -1.01592900 | C  | -4.96745100 | -1.73368400 | 0.93488100  |
| C  | 3.73845800  | -2.50095500 | 0.09005700  | C  | -4.56051200 | -2.48642700 | -0.17144800 |
| C  | 2.55156800  | -3.34078700 | 0.02107000  | C  | -3.37886600 | -3.33218100 | -0.08711600 |
| C  | -0.30917600 | -3.37999000 | 0.15654100  | C  | -0.51640700 | -3.38285400 | -0.16271100 |
| C  | 0.48269500  | -3.26949500 | 1.37624300  | C  | -1.28177400 | -3.25455200 | -1.39742000 |
| C  | 1.88104600  | -3.27508400 | 1.31508900  | C  | -2.68086800 | -3.25460900 | -1.36584300 |
| C  | 2.65728900  | -2.39576400 | 2.17785800  | C  | -3.43513700 | -2.36206500 | -2.23470000 |
| C  | 3.81097200  | -1.92512100 | 1.42542900  | C  | -4.60243300 | -1.89508000 | -1.50132000 |
| C  | 4.28593400  | -0.62141200 | 1.60461700  | C  | -5.06787600 | -0.58717200 | -1.67529500 |
| C  | 4.70627800  | 0.16692300  | 0.45466400  | C  | -5.50927500 | 0.18979900  | -0.52552000 |
| C  | 4.31964700  | 1.55186300  | 0.68837800  | C  | -5.11257200 | 1.57576500  | -0.73502300 |
| C  | 3.87448500  | 2.34946100  | -0.37062400 | C  | -4.68682800 | 2.35933000  | 0.34239200  |
| C  | 0.26508400  | 1.54538700  | -2.90069000 | C  | -1.13409500 | 1.51265600  | 2.93841100  |
| C  | 1.96880000  | 3.27881000  | -1.39857700 | C  | -2.80027100 | 3.26950100  | 1.42162300  |
| C  | 2.18035900  | -2.57020400 | -2.29658500 | C  | -3.05290200 | -2.58914500 | 2.24616500  |
| Na | 0.79824700  | 0.38495500  | -0.12782700 | Na | -1.60427900 | 0.37811800  | 0.14642000  |
| Cl | -4.71990300 | 1.84894800  | 1.05000600  | Al | 4.95718800  | 0.00525600  | -0.02130900 |
| Cl | -7.82559100 | 0.15011700  | -0.03605800 | Br | 4.18453700  | -1.96976900 | -1.20775700 |
| Cl | -4.85613900 | -1.76388200 | 1.15219900  | Br | 7.32908500  | 0.19748400  | 0.06711300  |
| Cl | -4.72723800 | -0.10130000 | -2.04765600 | Br | 3.99245800  | -0.12035400 | 2.23158500  |
| Al | -5.62243500 | 0.03684300  | 0.03468700  | Br | 3.97279200  | 1.94686100  | -1.16050800 |

**Table S2.** Optimized Cartesian Coordinates (in Å) for Na@C59[8-5]-AlCl<sub>4</sub> and Na@C59[8-5]-AlBr<sub>4</sub> at the M06/LANL2DZ Level of Theory

| Na@C59[8-5]-AlCl <sub>4</sub>     |             |             |             | Na@C59[8-5]-AlBr <sub>4</sub>     |             |             |             |
|-----------------------------------|-------------|-------------|-------------|-----------------------------------|-------------|-------------|-------------|
| (Charge=-1 ; Spin multiplicity=2) |             |             |             | (Charge=-1 ; Spin multiplicity=2) |             |             |             |
| <i>Atom</i>                       | <i>x</i>    | <i>y</i>    | <i>z</i>    | <i>Atom</i>                       | <i>x</i>    | <i>y</i>    | <i>z</i>    |
| C                                 | -0.19370600 | 1.49883600  | 2.98333300  | C                                 | -1.08781500 | 1.49533800  | 3.00590400  |
| C                                 | 0.34935100  | 0.16313100  | 3.04865600  | C                                 | -0.55989100 | 0.15451600  | 3.08642500  |
| C                                 | 1.33695400  | -0.23047100 | 2.13689800  | C                                 | 0.44595000  | -0.25103500 | 2.19933000  |
| C                                 | 1.76354300  | 0.65596000  | 1.03035100  | C                                 | 0.90910200  | 0.62860600  | 1.10186600  |
| C                                 | 1.42995500  | 2.01637800  | 1.15788300  | C                                 | 0.58332800  | 1.99240900  | 1.21847400  |
| C                                 | 0.34996300  | 2.40254600  | 2.06325400  | C                                 | -0.51345000 | 2.39155900  | 2.09742800  |
| C                                 | -1.62877600 | 1.42054400  | 3.19121200  | C                                 | -2.52825700 | 1.43197100  | 3.17922400  |
| C                                 | -1.97026500 | 0.02003000  | 3.42050000  | C                                 | -2.88913900 | 0.03540700  | 3.40219300  |
| C                                 | -0.74002500 | -0.76180600 | 3.36966300  | C                                 | -1.66583300 | -0.75878300 | 3.38227500  |
| C                                 | -0.75106400 | -2.05195900 | 2.82648400  | C                                 | -1.67664300 | -2.04987500 | 2.84138500  |
| C                                 | 1.38976300  | -1.60504200 | 1.68523000  | C                                 | 0.49635200  | -1.62714300 | 1.75193900  |
| C                                 | 1.98812000  | -0.23793500 | -0.17378600 | C                                 | 1.15630800  | -0.27087500 | -0.09508300 |
| C                                 | 1.72434300  | 2.35092100  | -1.24365700 | C                                 | 0.94140600  | 2.31866200  | -1.17398900 |
| C                                 | 1.28370600  | 2.85024500  | -0.04939700 | C                                 | 0.47565900  | 2.82629800  | 0.00763000  |

|    |             |             |             |    |             |             |             |
|----|-------------|-------------|-------------|----|-------------|-------------|-------------|
| C  | 0.00581300  | 3.50968600  | 0.01341200  | C  | -0.79592100 | 3.49935600  | 0.03818000  |
| C  | -0.55307700 | 3.29206500  | 1.33483800  | C  | -1.38906300 | 3.28939000  | 1.34595000  |
| C  | -1.93795500 | 3.19059700  | 1.50416700  | C  | -2.77853100 | 3.20185600  | 1.48154400  |
| C  | -2.49059300 | 2.24320500  | 2.45803800  | C  | -3.36342600 | 2.26161700  | 2.42340200  |
| C  | -3.15575700 | -0.50448600 | 2.89305800  | C  | -4.06648600 | -0.47814600 | 2.84683900  |
| C  | -4.03701900 | 0.34530000  | 2.09796400  | C  | -4.91970300 | 0.37880800  | 2.02931700  |
| C  | -3.70925700 | 1.68768200  | 1.88408800  | C  | -4.57334600 | 1.71742600  | 1.82111200  |
| C  | -3.90171500 | 2.28654400  | 0.56943400  | C  | -4.72780000 | 2.31567800  | 0.50112100  |
| C  | -2.81141000 | 3.21963600  | 0.33167700  | C  | -3.62292500 | 3.23735500  | 0.28824500  |
| C  | -2.26414300 | 3.35504600  | -0.95328200 | C  | -3.04273500 | 3.36453300  | -0.98325200 |
| C  | -0.82457700 | 3.49703300  | -1.12414200 | C  | -1.59840500 | 3.49231100  | -1.11951400 |
| C  | -0.42991300 | 2.68963000  | -2.26838600 | C  | -1.18382800 | 2.67792200  | -2.25207700 |
| C  | 0.79245200  | 1.96881200  | -2.22934100 | C  | 0.02993200  | 1.94471600  | -2.18228200 |
| C  | 1.93023900  | -1.57940900 | 0.35414300  | C  | 1.06926900  | -1.61030500 | 0.43447700  |
| C  | -0.71009700 | -1.37586700 | -3.14633100 | C  | -1.48425100 | -1.38686500 | -3.12951300 |
| C  | 0.10124200  | -2.26348400 | -2.44197200 | C  | -0.69969100 | -2.28187400 | -2.40471800 |
| C  | -0.50993200 | -3.24026800 | -1.52802200 | C  | -1.34253700 | -3.25021800 | -1.50375700 |
| C  | -1.90270100 | -3.25887900 | -1.36707500 | C  | -2.73875300 | -3.25407200 | -1.37641000 |
| C  | -2.74644200 | -2.37119800 | -2.16132300 | C  | -3.55387400 | -2.35933800 | -2.19230000 |
| C  | -2.68164800 | -0.10510000 | -3.16736100 | C  | -3.44155500 | -0.09613100 | -3.20045900 |
| C  | -1.55279100 | 0.80093900  | -3.34339100 | C  | -2.29950500 | 0.79803200  | -3.35046100 |
| C  | -0.31552700 | 0.01729400  | -3.23972400 | C  | -1.07336600 | 0.00215300  | -3.21522200 |
| C  | 0.80589800  | 0.53489800  | -2.52728400 | C  | 0.03572700  | 0.51030700  | -2.47685200 |
| C  | 1.55335200  | -0.37207400 | -1.61861200 | C  | 0.75126800  | -0.40315200 | -1.54920300 |
| C  | 1.31705000  | -1.78179200 | -1.83368800 | C  | 0.50520100  | -1.81056600 | -1.76706600 |
| C  | 0.37400000  | -3.34402800 | -0.35702700 | C  | -0.48835300 | -3.36051800 | -0.31130900 |
| C  | -0.19529600 | -3.36934600 | 0.93851000  | C  | -1.08883600 | -3.37680700 | 0.97025500  |
| C  | -1.63901200 | -3.38330800 | 1.09325500  | C  | -2.53599700 | -3.37595400 | 1.08999600  |
| C  | -2.48499600 | -3.35758500 | -0.03186700 | C  | -3.35411900 | -3.34380000 | -0.05529800 |
| C  | -3.68922700 | -2.53989000 | -0.00869700 | C  | -4.55023000 | -2.51416400 | -0.06302800 |
| C  | -3.86127700 | -1.93924300 | -1.32959200 | C  | -4.68422000 | -1.91455000 | -1.38876100 |
| C  | -4.37610100 | -0.64444300 | -1.44995600 | C  | -5.18273100 | -0.61478200 | -1.52394900 |
| C  | -3.78497900 | 0.28996600  | -2.40000300 | C  | -4.55899700 | 0.31165700  | -2.46089200 |
| C  | -1.62223800 | 2.09020300  | -2.82401300 | C  | -2.36828900 | 2.08907000  | -2.83529400 |
| C  | -2.76605900 | 2.50908700  | -2.03095300 | C  | -3.52678400 | 2.52112400  | -2.07110400 |
| C  | -3.82135200 | 1.61995400  | -1.80733400 | C  | -4.59607000 | 1.64317100  | -1.87158900 |
| C  | -4.40876300 | 1.50739400  | -0.48157700 | C  | -5.21689400 | 1.53934900  | -0.56045000 |
| C  | -4.75069300 | 0.11163700  | -0.25831300 | C  | -5.57840400 | 0.14762600  | -0.34311900 |
| C  | -4.57084800 | -0.45843300 | 1.00749800  | C  | -5.43506400 | -0.42175500 | 0.92772500  |
| C  | -4.03183300 | -1.80676800 | 1.13387600  | C  | -4.91289100 | -1.77513900 | 1.06950400  |
| C  | -3.15863600 | -1.83423700 | 2.29960000  | C  | -4.06852000 | -1.80906000 | 2.25587900  |
| C  | -1.98519800 | -2.59706400 | 2.27654200  | C  | -2.90266600 | -2.58375300 | 2.26289400  |
| C  | 1.51603200  | -2.51392700 | -0.61566800 | C  | 0.66750200  | -2.54219500 | -0.54353100 |
| C  | 0.35572900  | -2.50988500 | 1.99135600  | C  | -0.55468000 | -2.52088700 | 2.03439900  |
| C  | -2.15401000 | -1.45393700 | -3.04128800 | C  | -2.93109700 | -1.45005800 | -3.05949700 |
| Na | -0.71038400 | -0.57949900 | -0.04803800 | Na | -1.55147300 | -0.57664800 | -0.04069800 |
| Al | 5.63472000  | 0.01352800  | -0.00150100 | Al | 4.97647300  | -0.00989000 | 0.00103500  |
| Cl | 4.83966100  | -0.26460400 | 2.08947600  | Br | 4.10226900  | -0.09439600 | 2.27353500  |

|    |            |             |             |    |            |             |             |
|----|------------|-------------|-------------|----|------------|-------------|-------------|
| Cl | 7.85629800 | 0.25309400  | 0.08786000  | Br | 7.38333700 | 0.21000200  | 0.08758800  |
| Cl | 4.73327200 | 1.89163000  | -0.87382900 | Br | 4.06013900 | 1.95318000  | -1.13263700 |
| Cl | 5.10437400 | -1.74608400 | -1.28604800 | Br | 4.36509700 | -2.00841100 | -1.22206900 |

**Table S3.** Optimized Cartesian Coordinates (in Å) for Na@C60[6]-AlCl<sub>4</sub> and Na@C60[6]-AlBr<sub>4</sub> at the M06/LANL2DZ Level of Theory

| Na@C60[6]-AlCl <sub>4</sub>      |             |             |             | Na@C60[6]-AlBr <sub>4</sub>      |             |             |             |
|----------------------------------|-------------|-------------|-------------|----------------------------------|-------------|-------------|-------------|
| (Charge=0 ; Spin multiplicity=1) |             |             |             | (Charge=0 ; Spin multiplicity=1) |             |             |             |
| <i>Atom</i>                      | <i>x</i>    | <i>y</i>    | <i>z</i>    | <i>Atom</i>                      | <i>x</i>    | <i>y</i>    | <i>z</i>    |
| C                                | 0.69985305  | 0.67979805  | 3.42913925  | C                                | 1.48661900  | 0.68538600  | 3.42767600  |
| C                                | -0.38843303 | 1.41130210  | 2.79458220  | C                                | 0.39854600  | 1.41585800  | 2.79156600  |
| C                                | -1.41910310 | 0.72335905  | 2.18427616  | C                                | -0.63192300 | 0.72692500  | 2.18203900  |
| C                                | -1.42032210 | -0.73374805 | 2.17930816  | C                                | -0.63314500 | -0.73018800 | 2.17944500  |
| C                                | -0.39083703 | -1.42759510 | 2.78490320  | C                                | 0.39613600  | -1.42305100 | 2.78651300  |
| C                                | 0.69867205  | -0.70229705 | 3.42441025  | C                                | 1.48543400  | -0.69671400 | 3.42519900  |
| C                                | 1.93633314  | 1.40618710  | 3.18025523  | C                                | 2.72318400  | 1.41136500  | 3.17802000  |
| C                                | 1.61325812  | 2.58712619  | 2.39191917  | C                                | 2.40037500  | 2.59101900  | 2.38765300  |
| C                                | 0.17735401  | 2.59162919  | 2.15437315  | C                                | 0.96455000  | 2.59513900  | 2.14962200  |
| C                                | -0.32028002 | 3.02177122  | 0.93822007  | C                                | 0.46732200  | 3.02330000  | 0.93260400  |
| C                                | -1.94189014 | 1.17805408  | 0.90362707  | C                                | -1.15428200 | 1.17953300  | 0.90047700  |
| C                                | -1.94382714 | -1.17881108 | 0.89560107  | C                                | -1.15622500 | -1.17734100 | 0.89629100  |
| C                                | -1.41592810 | -2.29801417 | 0.28190102  | C                                | -0.62812600 | -2.29754500 | 0.28459200  |
| C                                | -0.32539802 | -3.02548222 | 0.91764007  | C                                | 0.46219000  | -3.02397900 | 0.92187800  |
| C                                | 0.17294401  | -2.60452919 | 2.13670215  | C                                | 0.96012800  | -2.60104100 | 2.14041800  |
| C                                | 1.60884912  | -2.60408718 | 2.37425917  | C                                | 2.39595400  | -2.60021600 | 2.37845200  |
| C                                | 1.93393214  | -1.42908810 | 3.17061523  | C                                | 2.72077600  | -1.42392200 | 3.17300000  |
| C                                | 3.10884622  | -0.73924405 | 2.93739021  | C                                | 3.89577000  | -0.73446200 | 2.93904200  |
| C                                | 3.11007323  | 0.71595405  | 2.94233321  | C                                | 3.89700100  | 0.72074200  | 2.94161300  |
| C                                | 2.48121818  | 3.01784422  | 1.40609510  | C                                | 3.26866500  | 3.02012700  | 1.40141700  |
| C                                | 3.71658027  | 2.28928616  | 1.15452608  | C                                | 4.50410800  | 2.29115600  | 1.15144600  |
| C                                | 4.02330529  | 1.16885608  | 1.90262514  | C                                | 4.81058000  | 1.17194600  | 1.90147200  |
| C                                | 4.58663733  | -0.00716700 | 1.25500209  | C                                | 5.37412300  | -0.00513300 | 1.25595400  |
| C                                | 4.02131229  | -1.18661509 | 1.89462114  | C                                | 4.80858100  | -1.18353500 | 1.89730700  |
| C                                | 3.71266727  | -2.30139616 | 1.13890408  | C                                | 4.50018400  | -2.29954500 | 1.14330500  |
| C                                | 2.47607618  | -3.02954722 | 1.38551810  | C                                | 3.26350800  | -3.02729000 | 1.39069400  |
| C                                | 1.95186114  | -3.47379325 | 0.10279401  | C                                | 2.73971800  | -3.47362400 | 0.10852200  |
| C                                | 0.58827504  | -3.47068925 | -0.12492301 | C                                | 1.37620800  | -3.47088700 | -0.11965400 |
| C                                | -2.25520316 | 0.00255200  | 0.10780601  | C                                | -1.46733500 | 0.00273700  | 0.10646800  |
| C                                | 0.60928704  | -1.40834910 | -3.18151423 | C                                | 1.39824400  | -1.41353200 | -3.17959500 |
| C                                | -0.56358204 | -0.71751805 | -2.93968021 | C                                | 0.22529700  | -0.72230400 | -2.93927700 |
| C                                | -0.56234504 | 0.74050305  | -2.93473621 | C                                | 0.22653800  | 0.73572300  | -2.93670900 |
| C                                | 0.61171305  | 1.43096110  | -3.17185823 | C                                | 1.40067700  | 1.42579000  | -3.17456600 |
| C                                | 1.84791813  | 0.70189005  | -3.42262625 | C                                | 2.63696300  | 0.69630800  | -3.42373400 |

|    |             |             |             |    |             |             |             |
|----|-------------|-------------|-------------|----|-------------|-------------|-------------|
| C  | 2.93332121  | -1.41010010 | -2.79146620 | C  | 3.72214800  | -1.41465400 | -2.78877100 |
| C  | 2.36766917  | -2.58931519 | -2.15177015 | C  | 3.15627900  | -2.59282300 | -2.14734300 |
| C  | 0.93159807  | -2.58819319 | -2.39356317 | C  | 1.72028900  | -2.59209100 | -2.38961500 |
| C  | 0.06363900  | -3.01569422 | -1.40540810 | C  | 0.85200000  | -3.01797800 | -1.40105300 |
| C  | -1.17446208 | -2.29280817 | -1.15506008 | C  | -0.38618200 | -2.29468100 | -1.15229500 |
| C  | -1.47884411 | -1.17021009 | -1.90252014 | C  | -0.69031100 | -1.17330200 | -1.90168500 |
| C  | -1.47685111 | 1.18769909  | -1.89450814 | C  | -0.68831300 | 1.18461700  | -1.89751600 |
| C  | -1.17058409 | 2.30469817  | -1.13944508 | C  | -0.38229300 | 2.30284400  | -1.14417200 |
| C  | 0.06877100  | 3.02713122  | -1.38485010 | C  | 0.85714600  | 3.02487200  | -1.39034200 |
| C  | 0.93602307  | 2.60486419  | -2.37588817 | C  | 1.72472600  | 2.60098800  | -2.38040200 |
| C  | 2.37209417  | 2.60190919  | -2.13411715 | C  | 3.16071700  | 2.59842300  | -2.13814900 |
| C  | 2.93575421  | 1.42610010  | -2.78182820 | C  | 3.72458800  | 1.42155800  | -2.78375500 |
| C  | 3.96862228  | 0.73284505  | -2.17919216 | C  | 4.75725300  | 0.72928300  | -2.17964700 |
| C  | 3.96737428  | -0.72274505 | -2.18413816 | C  | 4.75600200  | -0.72631300 | -2.18222100 |
| C  | 2.86506221  | -3.02133522 | -0.93730407 | C  | 3.65326700  | -3.02286500 | -0.93200900 |
| C  | 3.95330129  | -2.29668017 | -0.29695102 | C  | 4.74129500  | -2.29717000 | -0.29247600 |
| C  | 4.49083932  | -1.17762409 | -0.90408206 | C  | 5.27903900  | -1.17910700 | -0.90125100 |
| C  | 4.81564534  | -0.00272600 | -0.10781701 | C  | 5.60358400  | -0.00291300 | -0.10679400 |
| C  | 4.49284032  | 1.17811608  | -0.89606506 | C  | 5.28104600  | 1.17664300  | -0.89707300 |
| C  | 3.95721629  | 2.29393817  | -0.28133402 | C  | 4.74522100  | 2.29346700  | -0.28433900 |
| C  | 2.87021821  | 3.02480222  | -0.91673507 | C  | 3.65843700  | 3.02329800  | -0.92129200 |
| C  | 1.95776414  | 3.47168325  | 0.12643201  | C  | 2.74563800  | 3.47188100  | 0.12084200  |
| C  | 0.59416504  | 3.47249125  | -0.10129401 | C  | 1.38211500  | 3.47232200  | -0.10733900 |
| C  | -2.03770915 | 0.00700000  | -1.25378509 | C  | -1.24938800 | 0.00496500  | -1.25505600 |
| C  | -1.41208610 | 2.30054117  | 0.29756202  | C  | -0.62427300 | 2.30103000  | 0.29275900  |
| C  | 1.84672013  | -0.67967805 | -3.42730325 | C  | 2.63576100  | -0.68526600 | -3.42615900 |
| Na | 0.83076906  | 0.00245200  | -0.00963200 | Na | 1.61867600  | 0.00243600  | -0.00994300 |
| Al | -5.80751044 | -0.00000300 | -0.00874600 | Al | -5.01960300 | 0.00000300  | -0.01126100 |
| Cl | -5.01335336 | 1.82110813  | -1.04338307 | Br | -4.17294000 | 1.93885800  | -1.11669600 |
| Cl | -8.04726060 | -0.00134100 | 0.02471300  | Br | -4.13678500 | 0.00042900  | 2.21577700  |
| Cl | -4.98135336 | -0.00299500 | 2.07333315  | Br | -4.17091700 | -1.93799800 | -1.11677200 |
| Cl | -5.01146436 | -1.81687813 | -1.04935808 | Br | -7.36117000 | -0.00133200 | 0.02294200  |

**Table S4.** Optimized Cartesian Coordinates (in Å) for Na@C60[5]-AlCl<sub>4</sub> and Na@C60[5]-AlBr<sub>4</sub> at the M06/LANL2DZ Level of Theory

| Na@C60[5]-AlCl <sub>4</sub>      |            |            |            | Na@C60[5]-AlBr <sub>4</sub>      |             |            |            |
|----------------------------------|------------|------------|------------|----------------------------------|-------------|------------|------------|
| (Charge=0 ; Spin multiplicity=1) |            |            |            | (Charge=0 ; Spin multiplicity=1) |             |            |            |
| <i>Atom</i>                      | <i>x</i>   | <i>y</i>   | <i>z</i>   | <i>Atom</i>                      | <i>x</i>    | <i>y</i>   | <i>z</i>   |
| C                                | 0.41297403 | 1.60024011 | 2.66693619 | C                                | -0.43701100 | 1.76451500 | 2.55910000 |
| C                                | 1.21438309 | 0.40422103 | 2.45703618 | C                                | 0.36215800  | 0.55601100 | 2.42635600 |
| C                                | 1.97634714 | 0.26653702 | 1.29634009 | C                                | 1.12377000  | 0.34276600 | 1.27690600 |
| C                                | 1.96847214 | 1.32063209 | 0.29438402 | C                                | 1.11777100  | 1.33045400 | 0.20941900 |
| C                                | 1.19916609 | 2.46745318 | 0.49356504 | C                                | 0.35061200  | 2.48911500 | 0.33462200 |
| C                                | 0.40534803 | 2.61093219 | 1.70300712 | C                                | -0.44283900 | 2.71132900 | 1.53234500 |

|   |             |             |             |   |             |             |             |
|---|-------------|-------------|-------------|---|-------------|-------------|-------------|
| C | -0.82832806 | 1.20186509  | 3.30960424  | C | -1.67899800 | 1.41047900  | 3.22594500  |
| C | -0.79413506 | -0.24024502 | 3.50177625  | C | -1.64746800 | -0.01640200 | 3.51019700  |
| C | 0.46860103  | -0.73378805 | 2.97548121  | C | -0.38569400 | -0.54502300 | 3.01668000  |
| C | 0.52013604  | -1.96446914 | 2.31462017  | C | -0.33649900 | -1.81564200 | 2.43609800  |
| C | 2.03296415  | -1.01485608 | 0.60585504  | C | 1.17795100  | -0.98037000 | 0.67001300  |
| C | 2.01311415  | 0.69294905  | -1.01726608 | C | 1.16114000  | 0.61987300  | -1.05928000 |
| C | 1.28765809  | 1.23881909  | -2.07591015 | C | 0.43661200  | 1.09808200  | -2.15077600 |
| C | 0.48587303  | 2.43653517  | -1.87042814 | C | -0.36293000 | 2.30799700  | -2.02255000 |
| C | 0.44163303  | 3.03601922  | -0.61067204 | C | -0.40595400 | 2.98711000  | -0.80382900 |
| C | -0.82059006 | 3.52786825  | -0.08398501 | C | -1.66721800 | 3.51406500  | -0.30981300 |
| C | -0.84338706 | 3.26486923  | 1.34640510  | C | -1.69038700 | 3.34337300  | 1.13449700  |
| C | -2.03501415 | 2.88480521  | 1.96716014  | C | -2.88266700 | 3.00611200  | 1.77830100  |
| C | -2.02736514 | 1.83096913  | 2.96856221  | C | -2.87689300 | 2.01864600  | 2.84521900  |
| C | -1.96018714 | -0.99377207 | 3.34646124  | C | -2.81493000 | -0.77616900 | 3.40347700  |
| C | -3.20874423 | -0.33759802 | 2.99064522  | C | -4.06229500 | -0.14184200 | 3.00627000  |
| C | -3.24021024 | 1.04564707  | 2.80406520  | C | -4.09120800 | 1.22664800  | 2.73137300  |
| C | -3.99758729 | 1.61483112  | 1.70063812  | C | -4.84761700 | 1.72531100  | 1.59369000  |
| C | -3.25216623 | 2.75092520  | 1.18298509  | C | -4.10012900 | 2.82448500  | 1.00427900  |
| C | -3.23045023 | 3.00445921  | -0.18952701 | C | -4.07805500 | 2.98944500  | -0.38166500 |
| C | -1.99003014 | 3.40159525  | -0.83613306 | C | -2.83695200 | 3.34199500  | -1.05236000 |
| C | -1.94514414 | 2.77557920  | -2.14710515 | C | -2.79333600 | 2.63312000  | -2.32048900 |
| C | -0.73208305 | 2.30176416  | -2.65213619 | C | -1.58119800 | 2.12564100  | -2.79405200 |
| C | 2.05693315  | -0.75052705 | -0.82784106 | C | 1.20229300  | -0.80856500 | -0.77768100 |
| C | -1.81322713 | -1.17127509 | -3.31194924 | C | -2.66884500 | -1.38054400 | -3.22984200 |
| C | -0.61333404 | -1.80208213 | -2.97073621 | C | -1.47009700 | -1.99040200 | -2.84883600 |
| C | -0.60541304 | -2.85823321 | -1.96835314 | C | -1.46405600 | -2.98011500 | -1.78079100 |
| C | -1.79866113 | -3.23800723 | -1.34661609 | C | -2.65795600 | -3.31702100 | -1.13602500 |
| C | -3.04691422 | -2.58079418 | -1.70247712 | C | -3.90501600 | -2.68166100 | -1.53334400 |
| C | -3.85572628 | -0.37284803 | -2.45780018 | C | -4.70978700 | -0.52519400 | -2.42872600 |
| C | -3.11124323 | 0.76325805  | -2.97625322 | C | -3.96323800 | 0.57394200  | -3.01893600 |
| C | -1.84886713 | 0.26974702  | -3.50332425 | C | -2.70182400 | 0.04530400  | -3.51322900 |
| C | -0.68342305 | 1.02232007  | -3.34334724 | C | -1.53497100 | 0.80441900  | -3.40179500 |
| C | 0.56512804  | 0.36624803  | -2.98857221 | C | -0.28761200 | 0.17012700  | -3.00563400 |
| C | 0.60129904  | -1.01902607 | -2.80755020 | C | -0.25399900 | -1.20075300 | -2.73615300 |
| C | 0.61693705  | -2.72920820 | -1.18617509 | C | -0.24140400 | -2.80347200 | -1.00845000 |
| C | 0.59746804  | -2.98616121 | 0.19087901  | C | -0.26123800 | -2.97155700 | 0.38224600  |
| C | -0.64910305 | -3.37694424 | 0.83722106  | C | -1.50848000 | -3.31777200 | 1.05226900  |
| C | -1.82130713 | -3.50119325 | 0.08413201  | C | -2.68097400 | -3.48787700 | 0.30865400  |
| C | -3.08398622 | -3.00684222 | 0.61139604  | C | -3.94268900 | -2.95838700 | 0.80308500  |
| C | -3.84152028 | -2.43904018 | -0.49288104 | C | -4.69925800 | -2.46115800 | -0.33535700 |
| C | -4.61004933 | -1.29070009 | -0.29372402 | C | -5.46563700 | -1.30098400 | -0.21027500 |
| C | -4.61809833 | -0.23686902 | -1.29616109 | C | -5.47181100 | -0.31358900 | -1.27822600 |
| C | -3.15773123 | 1.98967514  | -2.31132017 | C | -4.00739400 | 1.84055800  | -2.43401600 |
| C | -3.95170329 | 2.13099515  | -1.10111008 | C | -4.80100300 | 2.06066600  | -1.23538900 |
| C | -4.66769733 | 1.04069408  | -0.60420704 | C | -5.51898000 | 1.00580500  | -0.66962000 |
| C | -4.69089534 | 0.77724205  | 0.82541106  | C | -5.54255100 | 0.83461200  | 0.77394800  |
| C | -4.65531333 | -0.66381505 | 1.01762207  | C | -5.50962900 | -0.59121700 | 1.05817200  |
| C | -3.93031328 | -1.20984809 | 2.07843715  | C | -4.78555800 | -1.06944900 | 2.15184400  |



|    |             |             |             |    |             |             |             |
|----|-------------|-------------|-------------|----|-------------|-------------|-------------|
| C  | -3.12796523 | -2.40560617 | 1.87100814  | C  | -3.98544900 | -2.27753600 | 2.02155000  |
| C  | -1.90976214 | -2.27132616 | 2.65433719  | C  | -2.76693400 | -2.09556700 | 2.79470100  |
| C  | -0.69528605 | -2.74648620 | 2.14902316  | C  | -1.55338400 | -2.60440800 | 2.32094200  |
| C  | 1.36086510  | -1.58926511 | -1.70362312 | C  | 0.50459700  | -1.70044000 | -1.59790400 |
| C  | 1.32115710  | -2.11054815 | 1.10438608  | C  | 0.46415100  | -2.04051400 | 1.23775200  |
| C  | -3.05368222 | -1.56874211 | -2.66477219 | C  | -3.90998300 | -1.73338800 | -2.55855600 |
| Al | 6.01094644  | 0.01454500  | -0.00127900 | Al | 5.27999500  | 0.01034700  | -0.00229800 |
| Cl | 5.23021938  | -1.09477608 | -1.71348512 | Na | -1.47252400 | -0.52904100 | 0.02895700  |
| Cl | 5.14668837  | -0.89362507 | 1.79176613  | Br | 4.42764300  | 2.22517300  | -0.28539300 |
| Cl | 5.22879338  | 2.04813615  | -0.12964001 | Br | 4.42339400  | -1.31940100 | -1.79397400 |
| Cl | 8.15082260  | -0.02182700 | 0.05305500  | Br | 4.33420600  | -0.85233200 | 2.01596100  |
| Na | -0.61836904 | -0.52827204 | -0.00515700 | Br | 7.66880600  | -0.03072400 | 0.06092700  |

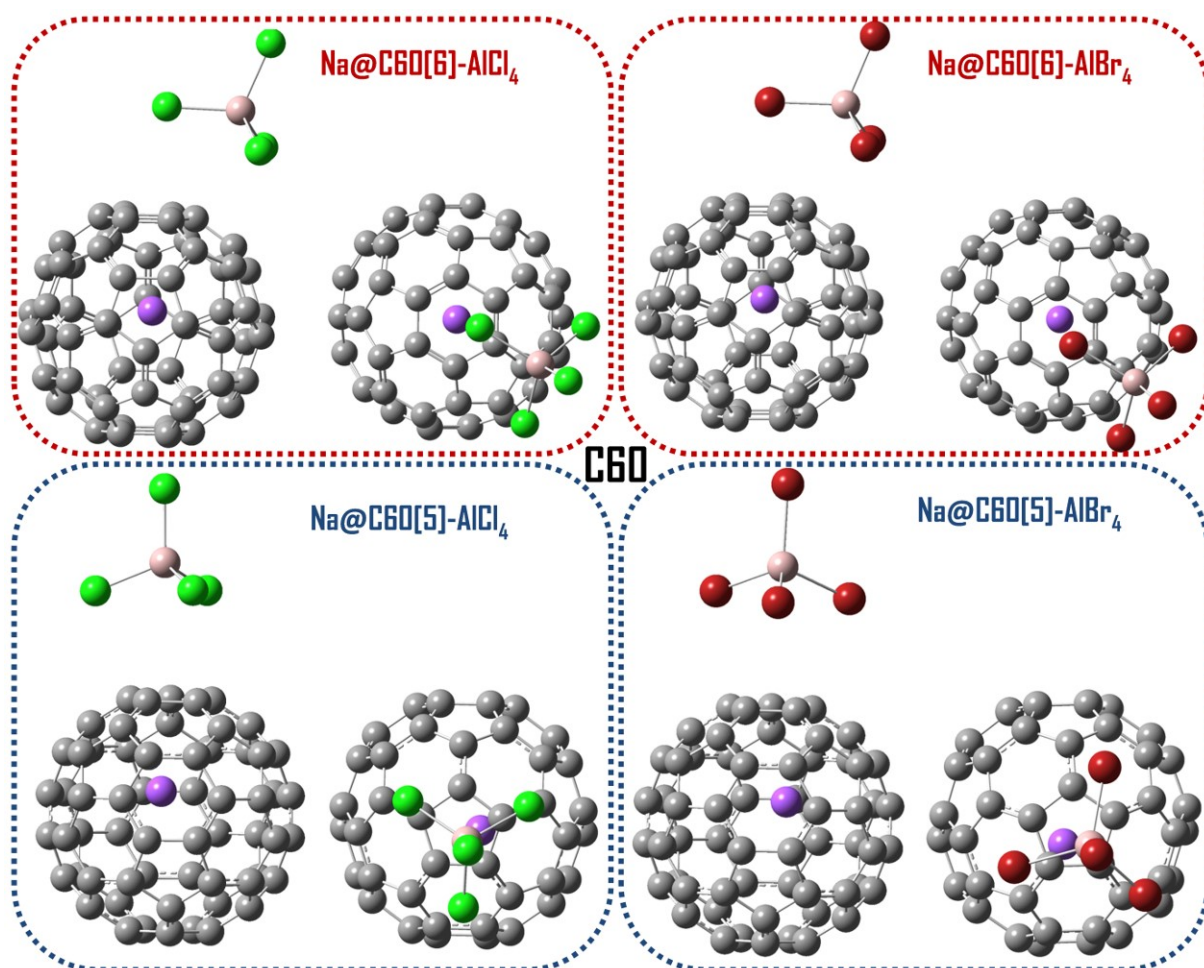

**Figure S1.** Optimized geometrical structures of  $\text{Na@C60[6]-AlX}_4$  and  $\text{Na@C60[5]-AlX}_4$  ( $\text{X}=\text{Cl,Br}$ ) endohedral metallofullerene-superhalogen compounds.

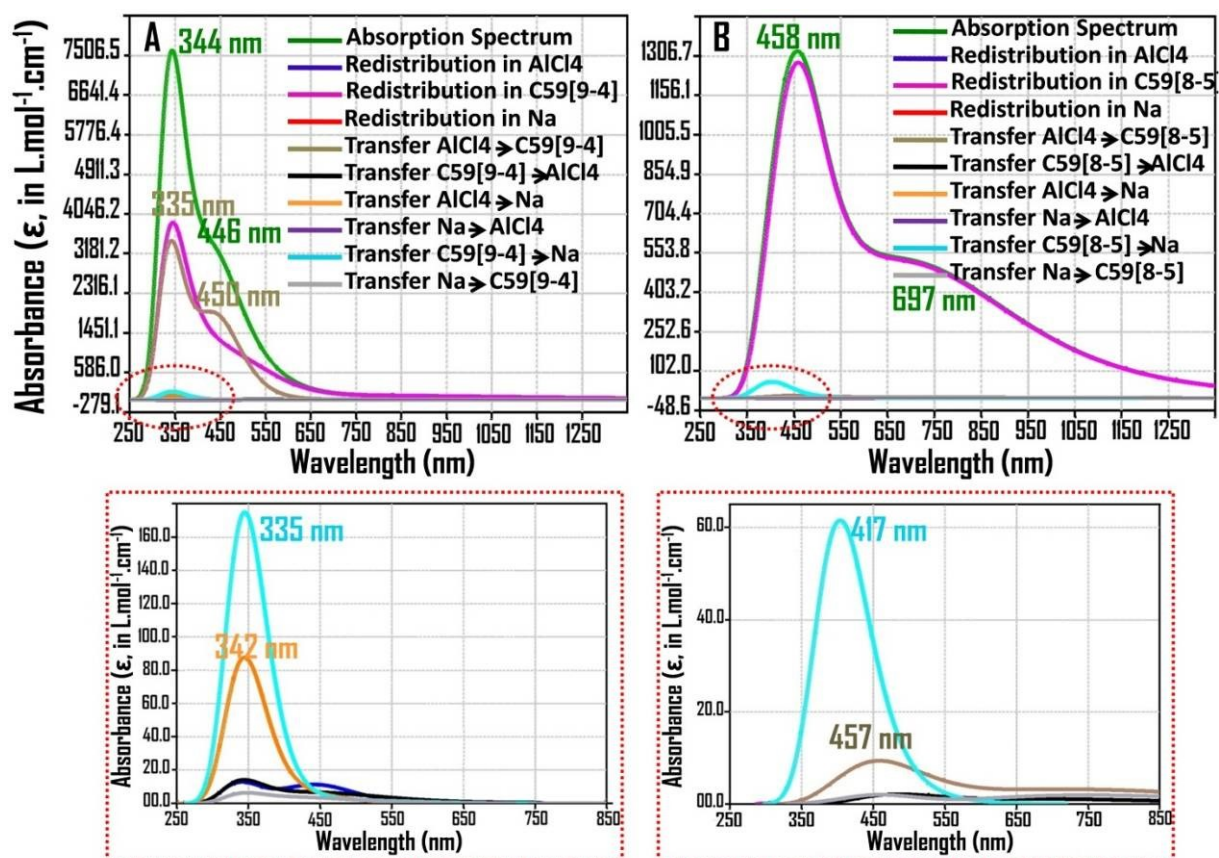

**Figure S2.** Simulated absorption spectra (green curves) and charge-transfer spectra (CTSs, colored curves) of **A)** Na@C59[9-4]-AlCl<sub>4</sub> and **B)** Na@C59[8-5]-AlCl<sub>4</sub>.

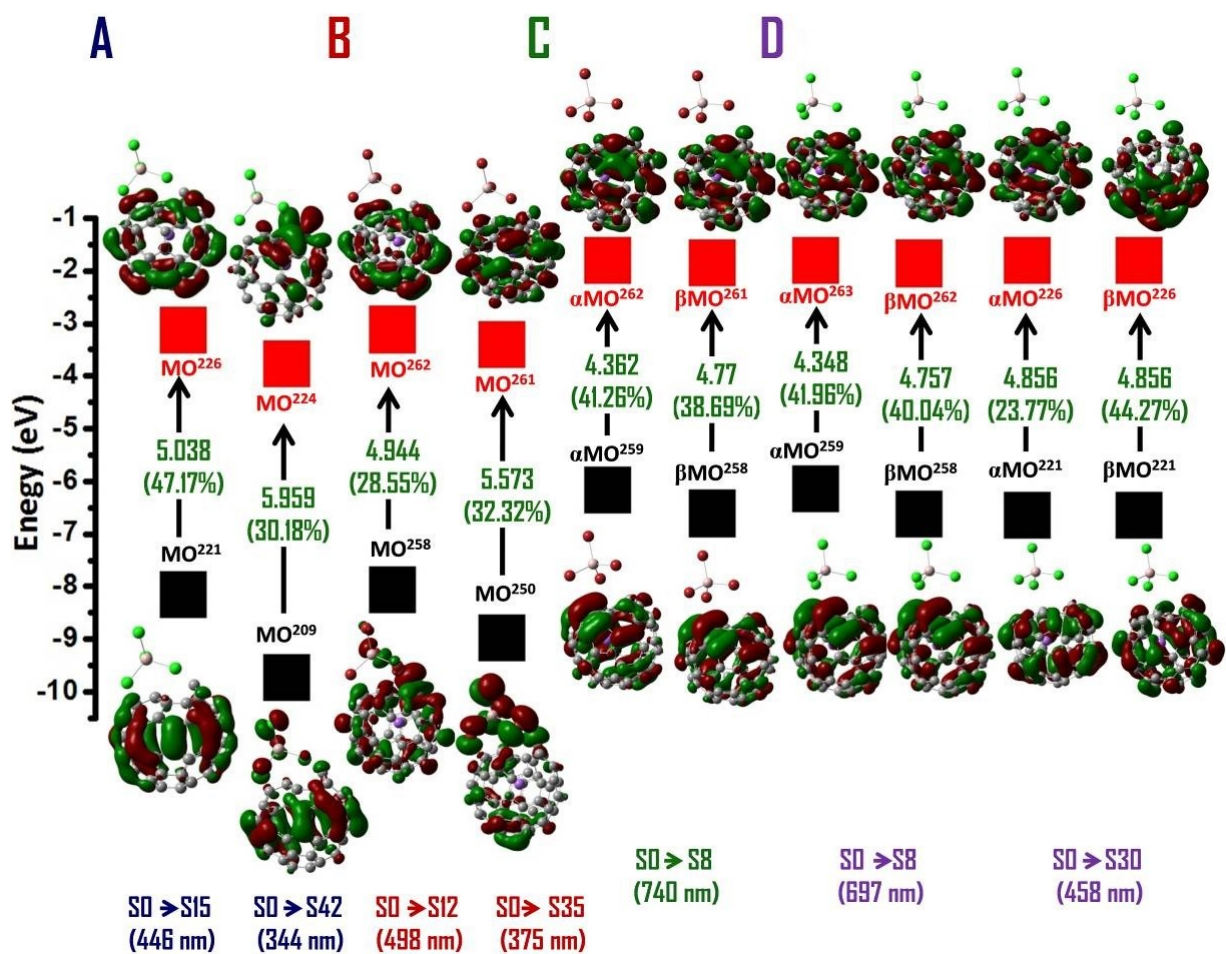

**Figure S3.** Contributions of molecular orbital (MO) transitions in A) Na@C59[9-4]-AlCl<sub>4</sub>, and B) Na@C59[9-4]-AlBr<sub>4</sub>, C) Na@C59[8-5]-AlBr<sub>4</sub> and D) Na@C59[8-5]-AlCl<sub>4</sub>. The numbers outside and inside the parentheses denote the energy gaps of the orbital (eV) and the contribution of the electronic transition of the corresponding excitations (%), respectively.



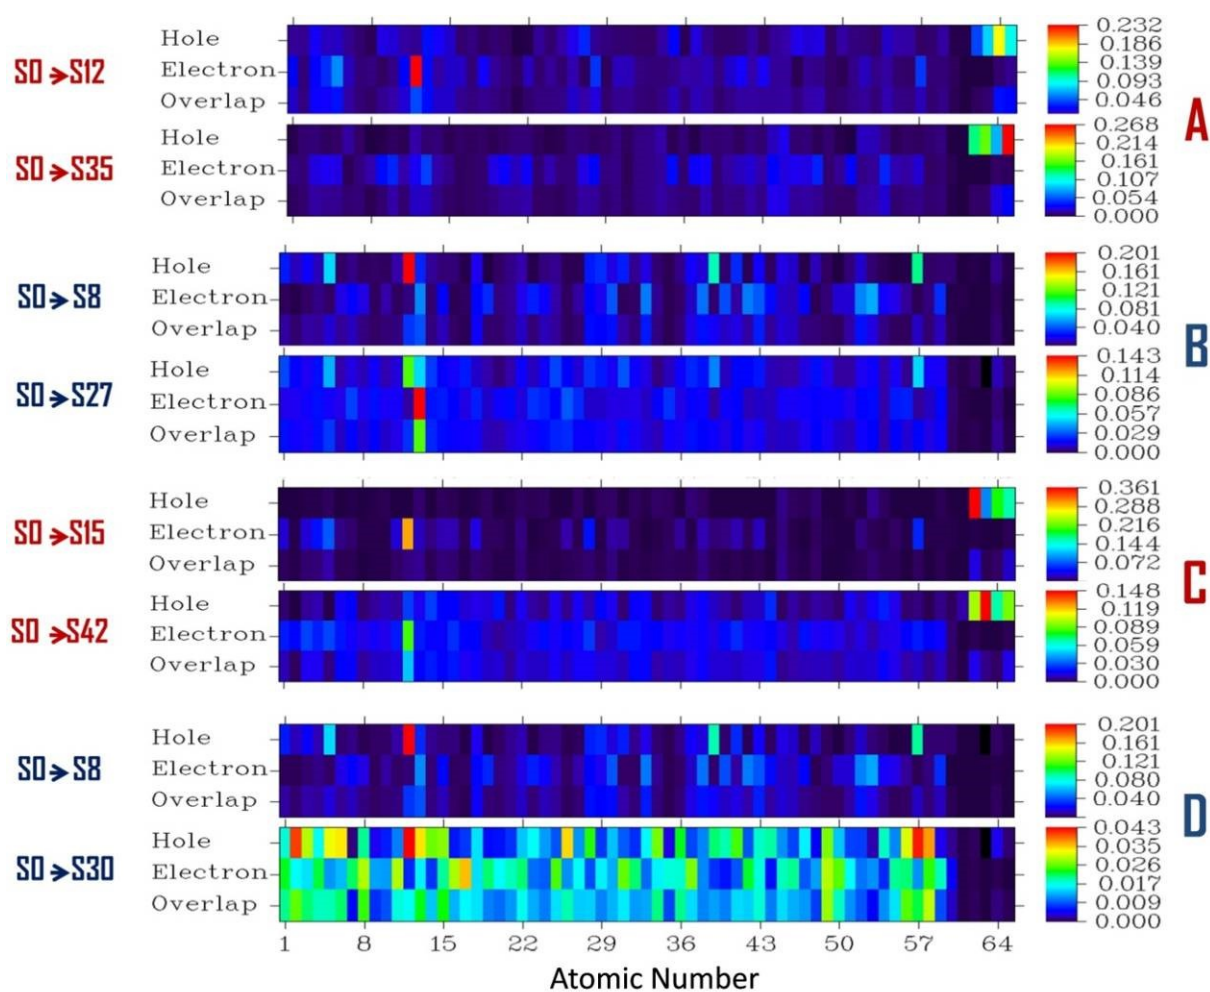

**Figure S4.** Transition density matrix (TDM) of **A**) Na@C59[9-4]-AlBr<sub>4</sub>, **B**) Na@C59[8-5]-AlBr<sub>4</sub>, **C**) Na@C59[9-4]-AlCl<sub>4</sub> and **D**) Na@C59[8-5]-AlCl<sub>4</sub> compounds. (See Figure 1 for the isomer atomic number).

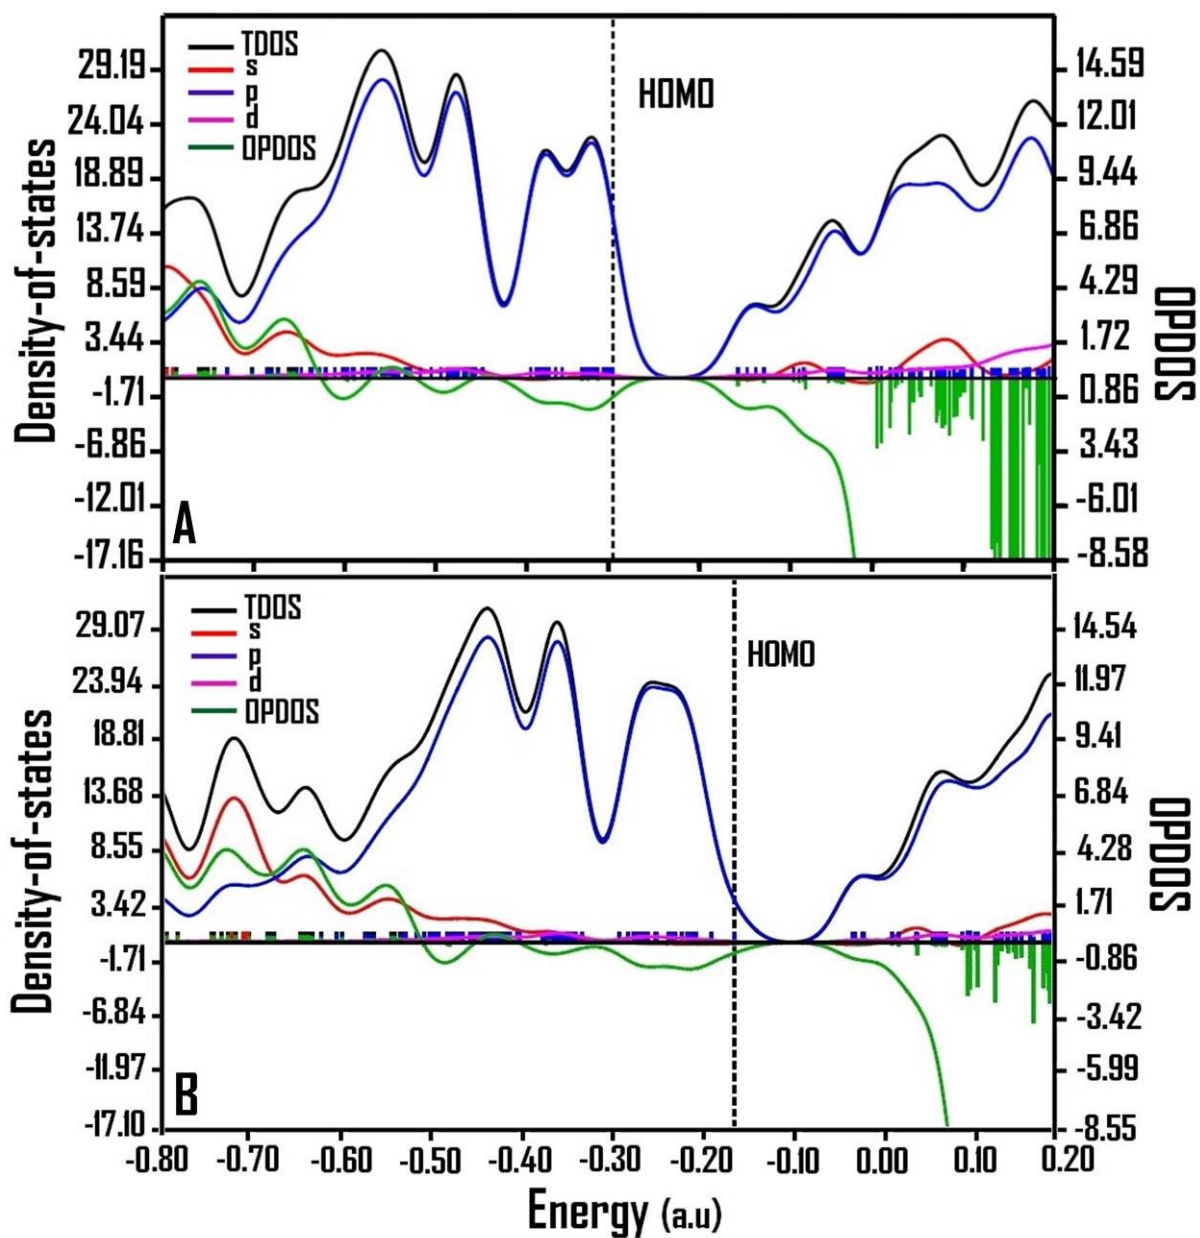

**Figure S5.** Total density of states (TDOS) map of **A)** Na@C59[9-4]-AlCl<sub>4</sub> and **B)** Na@C59[8-5]-AlCl<sub>4</sub> computed at the CAM-B3LYP/6-311G(d,p)/LANL2DZ level of theory.

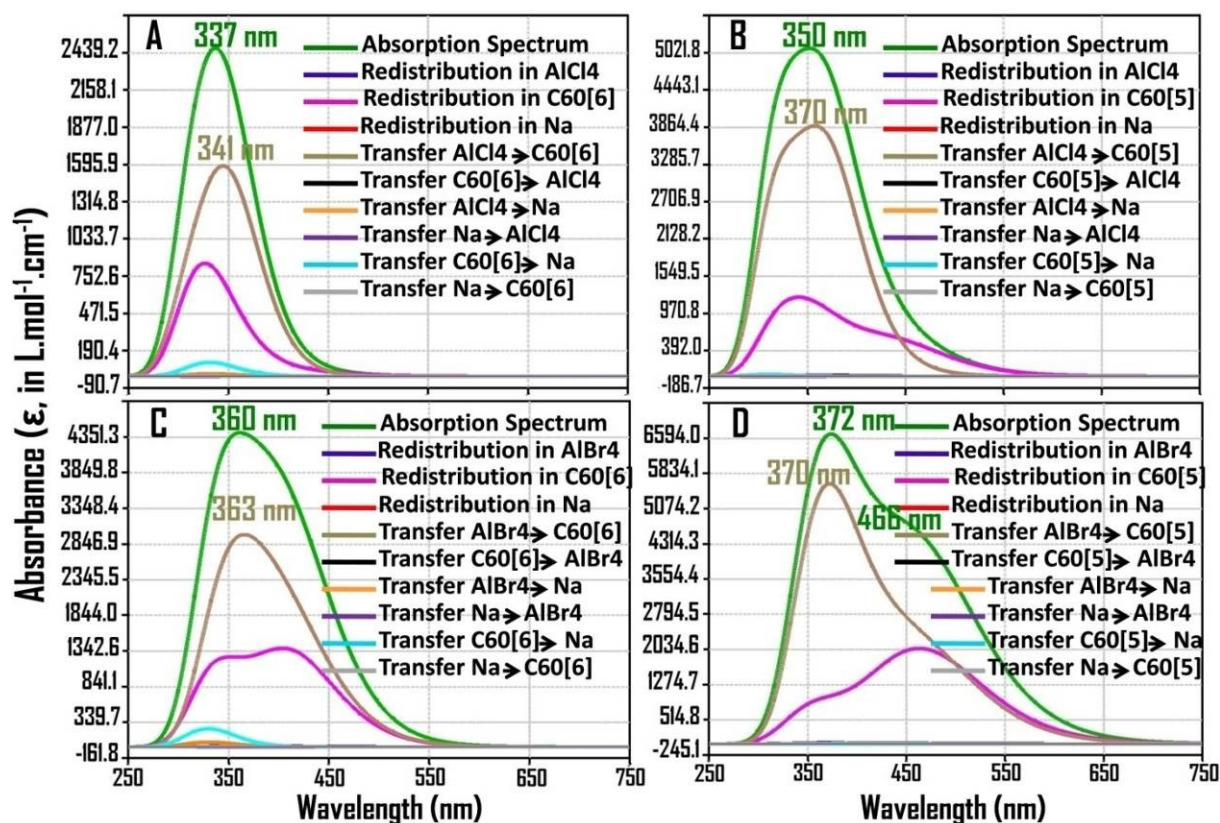

**Figure S6.** Simulated absorption spectra (green curves) and charge-transfer spectra (colored curves) of **A)** Na@C60[6]-AlCl<sub>4</sub>, **B)** Na@C60[5]-AlCl<sub>4</sub>, **C)** Na@C60[6]-AlBr<sub>4</sub>, and **D)** Na@C60[5]-AlBr<sub>4</sub>.

**Table S5.**  $D$ ,  $S_r$ ,  $H$ ,  $t$  Indices and Hole-Electron Coulomb Attraction Energies ( $E_{\text{coul}}$ ) of the Selected Excited States of both the Na@C60[6]-AlX<sub>4</sub> and Na@C60[5]-AlX<sub>4</sub> (X=Cl,Br) Isomers, Calculated at the CAM-B3LYP/6-311g(d,p)/LANL2DZ Level of Theory.

| States                            | $D(\text{\AA})$ | $S_r$ | $H(\text{\AA})$ | $t(\text{\AA})$ | $E_{\text{coul}}(\text{eV})$ |
|-----------------------------------|-----------------|-------|-----------------|-----------------|------------------------------|
| <b>Na@C60[6]-AlBr<sub>4</sub></b> |                 |       |                 |                 |                              |
| S0 → S1 <sup>a</sup>              | 0.663           | 0.860 | 3.949           | -1.981          | 3.603                        |
| S0 → S21                          | 1.802           | 0.786 | 4.260           | -1.047          | 3.235                        |
| S0 → S37                          | 5.809           | 0.404 | 3.933           | 2.958           | 2.602                        |
| <b>Na@C60[6]-AlCl<sub>4</sub></b> |                 |       |                 |                 |                              |
| S0 → S1 <sup>a</sup>              | 0.428           | 0.876 | 3.878           | -2.104          | 3.666                        |
| S0 → S22                          | 6.010           | 0.429 | 3.639           | 3.316           | 2.488                        |
| S0 → S27                          | 1.654           | 0.832 | 4.313           | -1.199          | 3.218                        |
| <b>Na@C60[5]-AlBr<sub>4</sub></b> |                 |       |                 |                 |                              |
| S0 → S1 <sup>a</sup>              | 2.182           | 0.744 | 4.288           | -0.895          | 3.225                        |
| S0 → S11                          | 4.806           | 0.438 | 3.896           | 2.112           | 2.796                        |
| S0 → S37                          | 5.670           | 0.372 | 3.994           | 2.836           | 2.598                        |
| <b>Na@C60[5]-AlCl<sub>4</sub></b> |                 |       |                 |                 |                              |
| S0 → S1 <sup>a</sup>              | 0.660           | 0.797 | 3.964           | -1.793          | 3.561                        |
| S0 → S22                          | 5.552           | 0.384 | 3.916           | 2.724           | 2.668                        |
| S0 → S45                          | 5.783           | 0.386 | 3.781           | 3.319           | 2.489                        |

<sup>a</sup> For comparison, the different indices are calculated for the first excited state (S1).



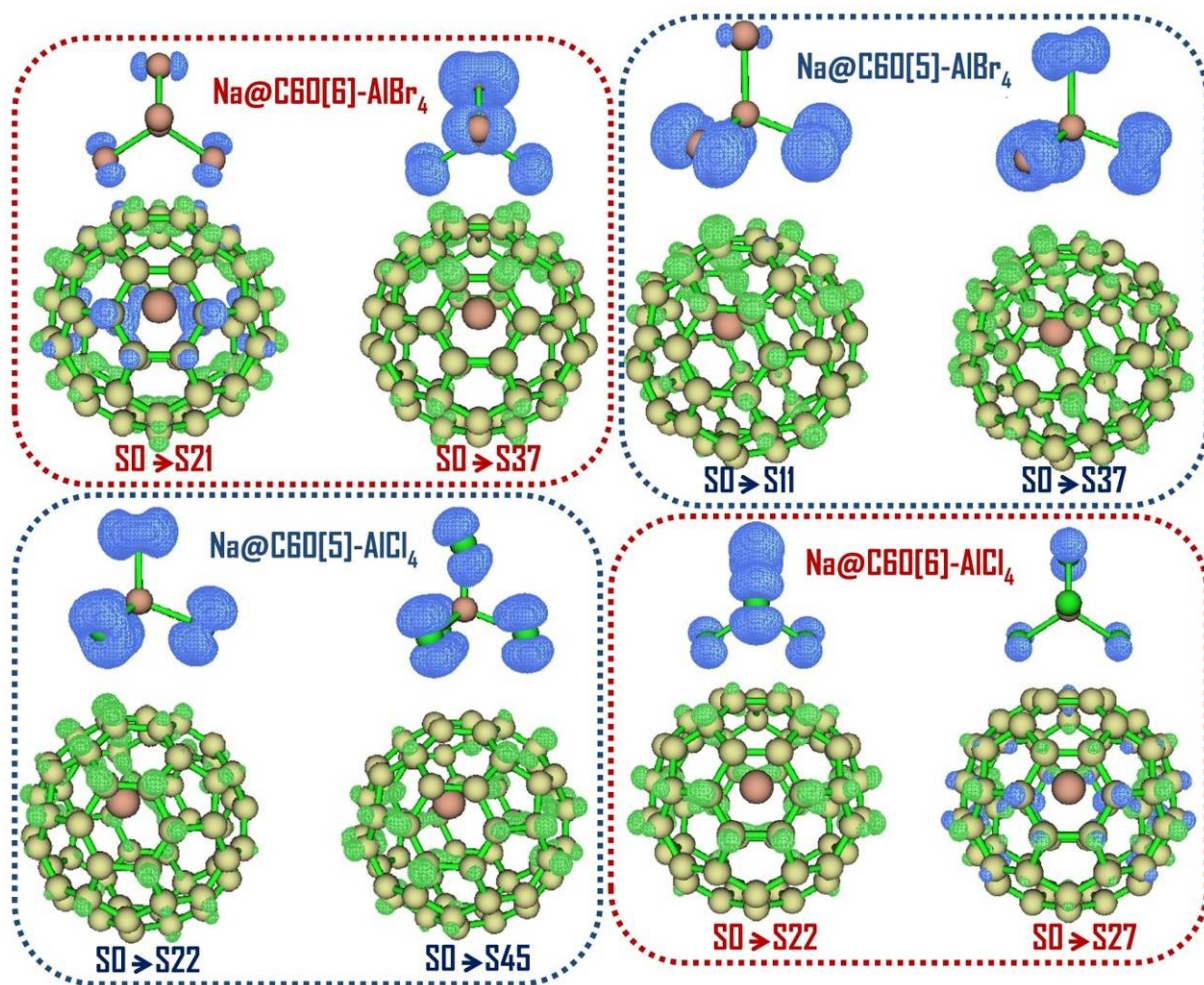

**Figure. S7** Real space representations of hole and electron distribution of  $\text{Na@C60[6]-AlX}_4$  and  $\text{Na@C60[5]-AlX}_4$  ( $\text{X}=\text{Cl},\text{Br}$ ). Green and blue regions denote the hole and electron distributions, respectively. The isovalues of hole and electron distributions are set to be 0.002 au.



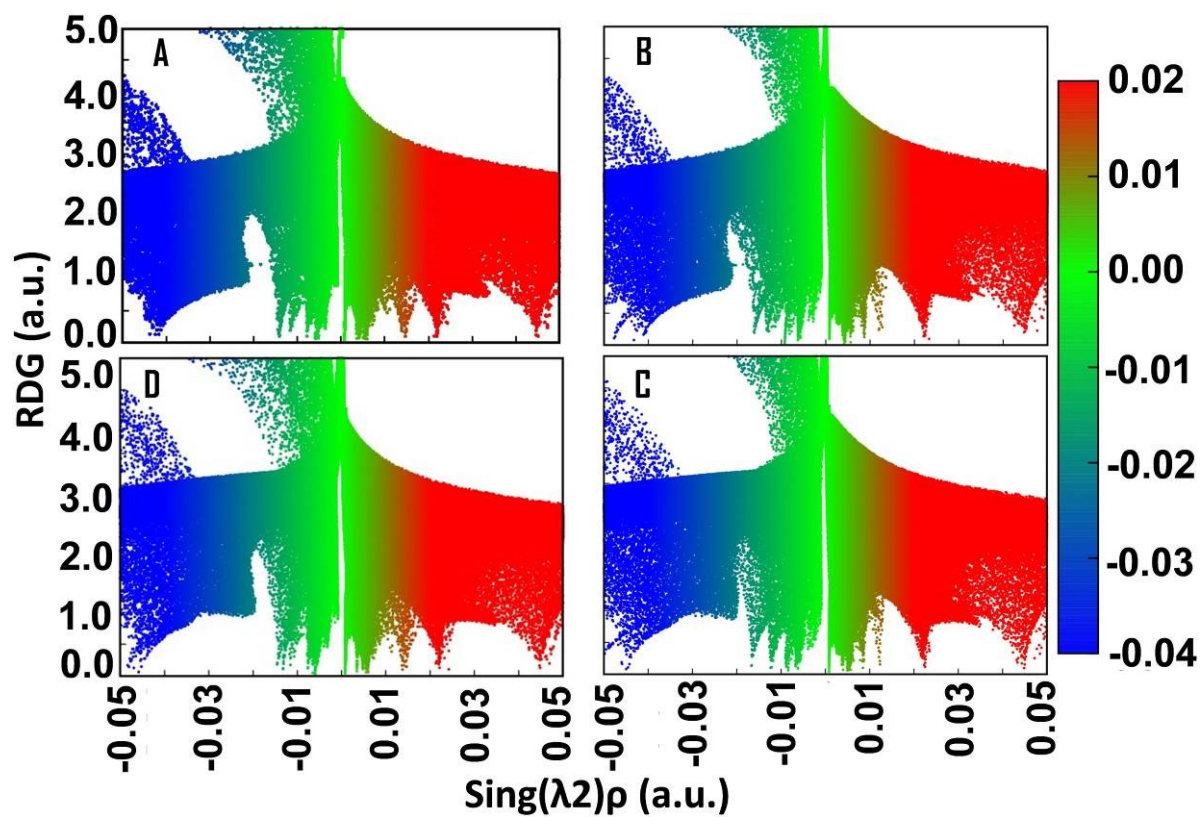

**Figure. S8** Scattering graphs between the reduced density gradient and sign ( $\lambda^2$ ) of A) Na@C59[8-5]-AlBr<sub>4</sub>, B) Na@C59[9-4]-AlBr<sub>4</sub>, C) Na@C59[9-4]-AlCl<sub>4</sub> and D) Na@C59[8-5]-AlCl<sub>4</sub> systems.

**Table S6.** Polarizabilities (a.u) and (hyper)polarizabilities (a.u) in zero frequency limit and frequency-dependent fields of Na@C60[6]-AlX<sub>4</sub> and Na@C60[5]-Alx<sub>4</sub> (X=Cl,Br).

|                                   | <i>Polarizability</i> |               |               | <i>First-order hyperpolarizability</i> |               |               |
|-----------------------------------|-----------------------|---------------|---------------|----------------------------------------|---------------|---------------|
|                                   | $\alpha_{xx}$         | $\alpha_{yy}$ | $\alpha_{zz}$ | $\beta_{xxx}$                          | $\beta_{yyy}$ | $\beta_{zzz}$ |
| $\lambda = \infty$ nm             |                       |               |               |                                        |               |               |
| <b>C60</b>                        | 537.00                | 536.91        | 536.91        | 0.00                                   | 0.00          | 0.00          |
| <b>Na@C60[5]-AlCl<sub>4</sub></b> | 698.10                | 577.73        | 573.76        | 6145.07                                | 73.50         | 6.53          |
| <b>Na@C60[5]-AlBr<sub>4</sub></b> | 789.25                | 603.44        | 603.43        | -107.11                                | 60.40         | 20.55         |
| <b>Na@C60[6]-AlCl<sub>4</sub></b> | 680.31                | 571.34        | 570.99        | -2944.18                               | 0.045         | 55.66         |
| <b>Na@C60[6]-AlBr<sub>4</sub></b> | 749.83                | 594.29        | 594.31        | -5339.62                               | 0.095         | 85.76         |
| $\lambda = 1908.54$ nm            |                       |               |               |                                        |               |               |
| <b>C60</b>                        | 540.32                | 540.23        | 540.22        | 0.000                                  | 0.000         | 0.000         |
| <b>Na@C60[5]-AlCl<sub>4</sub></b> | 703.43                | 580.92        | 580.95        | 6503.27                                | 75.48         | 6.77          |
| <b>Na@C60[5]-AlBr<sub>4</sub></b> | 796.89                | 606.77        | 606.77        | -11551.55                              | 61.74         | 20.90         |
| <b>Na@C60[6]-AlCl<sub>4</sub></b> | 684.65                | 574.35        | 574.01        | -3067.48                               | 0.045         | 57.16         |
| <b>Na@C60[6]-AlBr<sub>4</sub></b> | 755.37                | 597.39        | 597.45        | -5673.10                               | 0.105         | 89.021        |
| $\lambda = 1064.80$ nm            |                       |               |               |                                        |               |               |
| <b>C60</b>                        | 547.98                | 547.89        | 547.89        | 0.000                                  | 0.000         | 0.000         |
| <b>Na@C60[5]-AlCl<sub>4</sub></b> | 716.04                | 588.28        | 528.32        | 7451.52                                | 80.35         | 7.38          |
| <b>Na@C60[5]-AlBr<sub>4</sub></b> | 815.47                | 614.45        | 614.48        | -13920.70                              | 65.19         | 21.64         |
| <b>Na@C60[6]-AlCl<sub>4</sub></b> | 694.70                | 581.28        | 580.96        | -3380.07                               | 0.047         | 60.90         |
| <b>Na@C60[6]-AlBr<sub>4</sub></b> | 768.42                | 604.56        | 604.69        | -6569.54                               | 0.132         | 97.51         |
| $\lambda = 589.08$ nm             |                       |               |               |                                        |               |               |
| <b>C60</b>                        | 577.20                | 577.10        | 577.09        | 0.00                                   | 0.00          | 0.00          |
| <b>Na@C60[5]-AlCl<sub>4</sub></b> | 769.12                | 616.25        | 616.33        | 13784.00                               | 105.03        | 11.25         |
| <b>Na@C60[5]-AlBr<sub>4</sub></b> | 909.40                | 643.89        | 644.11        | -37619.90                              | 90.75         | 23.88         |
| <b>Na@C60[6]-AlCl<sub>4</sub></b> | 733.52                | 607.29        | 607.13        | -5061.36                               | 0.073         | 80.02         |
| <b>Na@C60[6]-AlBr<sub>4</sub></b> | 822.68                | 631.47        | 632.03        | -12938.20                              | 0.365         | 149.68        |

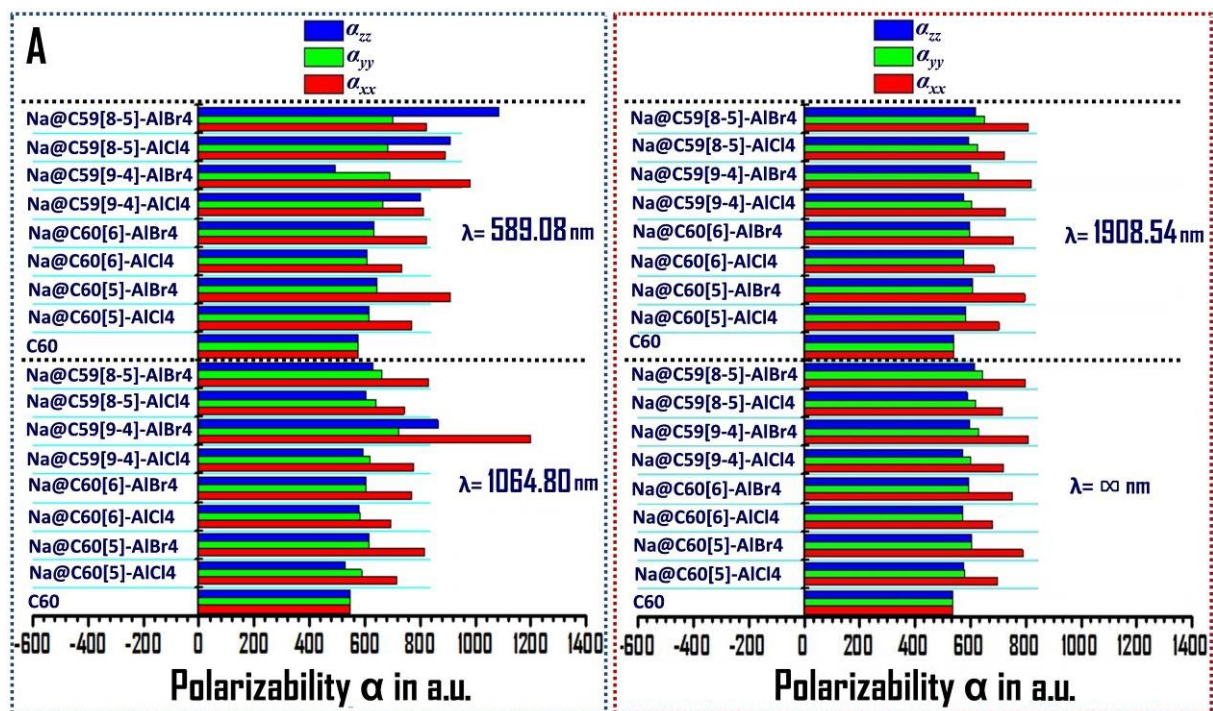

**Figure. S9** Polarizabilities ( $\alpha$ ) responses of C60, Na@C60[6]-AlX<sub>4</sub>, Na@C60[5]-AlX<sub>4</sub>, Na@C59[9-4]-AlX<sub>4</sub> and Na@C59[8-5]-AlX<sub>4</sub> (X=Cl, Br) in zero frequency limit and frequency-dependent fields.

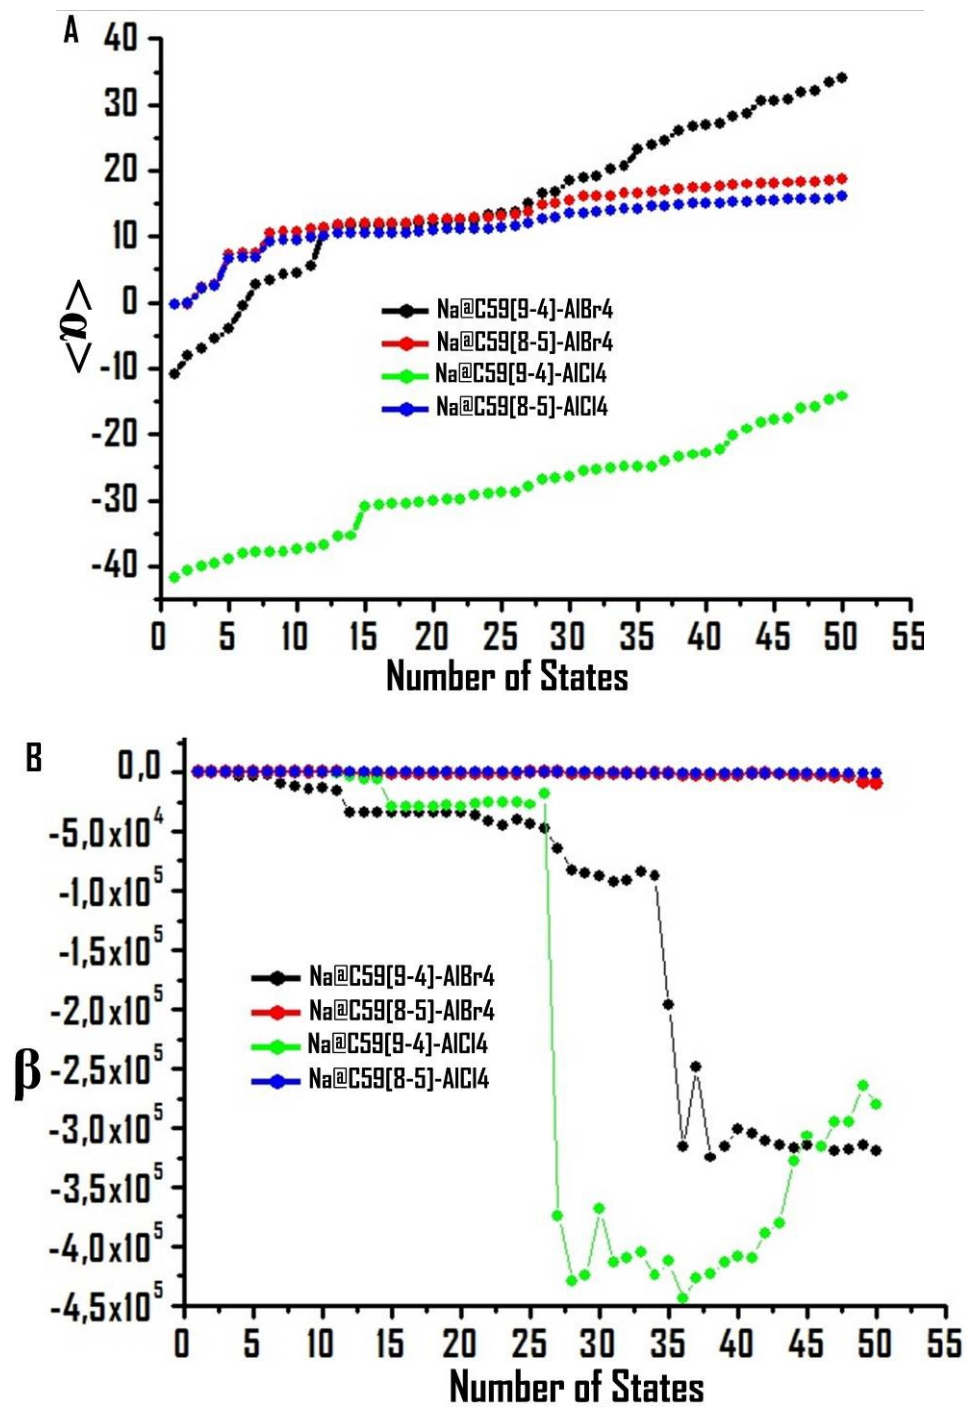

**Figure. S10** Variations of **A)** Polarizability  $\alpha$  ( $\lambda=1064.8$  nm) and **B)** Hyperpolarizability  $\beta$  ( $\lambda=1064.8$  and  $589.08$  nm) with the number of states.
